# Supplementary material
Source: PubMed Central journal article supplement (PMC3746865)
Supplement: 1307365110_pnas.201307365SI.pdf [file 1307365110_pnas.201307365SI.pdf]

# Supporting Information

Shalev et al. 10.1073/pnas.1307365110

## SI Materials and Methods

**Materials.** Geneticin (G418) and Apramycin were purchased from Apollo Scientific Limited as sulfate salts. Gentamicin sulfate was purchased from Molekula. All other chemicals and biochemicals, unless otherwise stated, were obtained from Merck or Sigma. RNA oligomers that were chemically synthesized and purified by denaturing polyacrylamide gel electrophoresis followed by desalting using solid phase extraction reverse-phase chromatography were purchased from Dharmacon and were used without further purification.

**Structure Determination and Refinement.** Data processing was performed with XDS (1) or Mosflm (2). Data collections and crystal data statistics are summarized in Table S1. Initial phases of both crystals were determined by molecular replacement using Phaser MR, CCP4 suite (3), using the coordinates of the bacterial A site in complex with Paromomycin (PDB ID code 1J7T) (4) or the human A site in complex with Apramycin (PDB ID code 2G5K) (5) as a search model. The molecular structures were constructed and manipulated with COOT (6). Data re-

finement has been performed using Refmac5, CCP4 suite, Phenix Refine (7), and CNS (8, 9). Structure refinement statistics are summarized in Table S1. Graphical representations were made using PyMOL (10).

**Promastigote Viability Assay (LC<sub>50</sub>).** Compounds to be assayed were diluted in serial concentrations ranging from 0.7 to 2,000  $\mu\text{M}$  (0.15–40  $\mu\text{M}$  and 0.7–400  $\mu\text{M}$  for G418 and Paromomycin, respectively) in a complete promastigote medium, and were aliquoted in triplicate (125  $\mu\text{L}$  per well) into 96-well flat-bottom plates (Nunc). Promastigotes ( $2.0 \times 10^6$  cells per mL; 125  $\mu\text{L}$  per well) were added to each well and incubated for 72 h at 26 °C. The alamarBlue viability indicator was added (25  $\mu\text{L}$  per well) and the plates were incubated for an additional 5 h, at which time the fluorescence ( $\lambda_{\text{ex}} = 544 \text{ nm}$ ;  $\lambda_{\text{em}} = 590 \text{ nm}$ ) was measured in a microplate reader (Fluoroskan Ascent FL). Complete medium was used as a negative control (0% inhibition of promastigote growth). Amphotericin B (1  $\mu\text{M}$ , Sigma-Aldrich), a drug used to treat visceral leishmaniasis, was included as a positive control in each plate.

1. Kabsch W (2010) XDS. *Acta Crystallogr D Biol Crystallogr* 66(Pt 2):125–132.
2. Batty TG, Kontogiannis L, Johnson O, Powell HR, Leslie AG (2011) iMOSFLM: A new graphical interface for diffraction-image processing with MOSFLM. *Acta Crystallogr D Biol Crystallogr* 67(Pt 4):271–281.
3. Collaborative Computational Project, Number 4 (1994) The CCP4 suite: Programs for protein crystallography. *Acta Crystallogr D Biol Crystallogr* 50(Pt 5):760–763.
4. Vicens Q, Westhof E (2001) Crystal structure of paromomycin docked into the eubacterial ribosomal decoding A site. *Structure* 9(8):647–658.
5. Kondo J, François B, Urzhumtsev A, Westhof E (2006) Crystal structure of the Homo sapiens cytoplasmic ribosomal decoding site complexed with apramycin. *Angew Chem Int Ed Engl* 45(20):3310–3314.
6. Emsley P, Cowtan K (2004) Coot: Model-building tools for molecular graphics. *Acta Crystallogr D Biol Crystallogr* 60(Pt 12 Pt 1):2126–2132.
7. Adams PD, et al. (2010) PHENIX: A comprehensive Python-based system for macromolecular structure solution. *Acta Crystallogr D Biol Crystallogr* 66(Pt 2): 213–221.
8. Brünger AT, et al. (1998) Crystallography & NMR system: A new software suite for macromolecular structure determination. *Acta Crystallogr D Biol Crystallogr* 54(Pt 5): 905–921.
9. Brunger AT (2007) Version 1.2 of the Crystallography and NMR system. *Nat Protoc* 2(11):2728–2733.
10. The PyMOL Molecular Graphics System, Version 1.5.0.4.S.L. Available at [www.pymol.org](http://www.pymol.org). Accessed July 1, 2013.





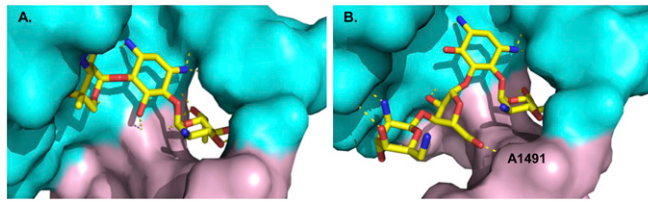

**Fig. 55.** Surface representations of aminoglycoside binding sites in leishmanian ribosomes. (A and B) The G418 position as crystallographically determined (A) and putative binding mode of Paromomycin as obtained by manual docking (B) based on this ligands binding to the bacterial ribosome. Aminoglycosides are represented in stick representation and highlighted in yellow. The coloring of the surface represent residue conservation among prokaryotic and eukaryotic systems, where residues marked in cyan are highly conserved among all kingdoms and residues marked in light pink are rather diverse. The Paromomycin position was obtained by superimposition of the A-site coordinates from the G418/leishmanial A-site structure (PDB ID code 4K32) and the paromomycin coordinates from the crystal structure of paromomycin bound to the bacterial A site (PDB ID code 1J7T). Figure was created with Pymol.

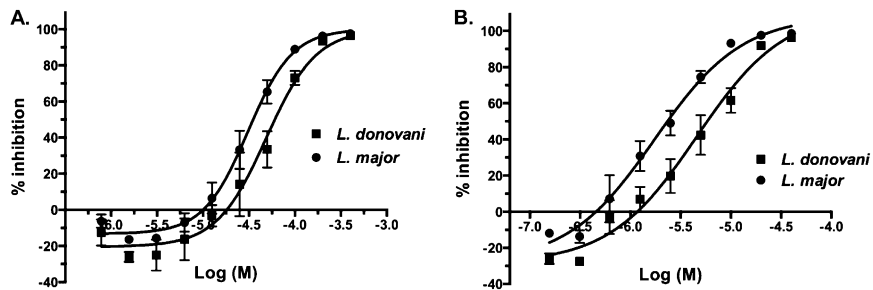

**Fig. 56.** Typical *L. major* and *L. donovani* growth inhibition curves used for the determination of LC<sub>50</sub> for Paromomycin (A) and G418 (B).

**Table S1. Crystal data, data collection, and data refinement statistics**

|                                                           | G418                                   | Apramycin                     |
|-----------------------------------------------------------|----------------------------------------|-------------------------------|
| PDB ID code                                               | 4K32                                   | 4K31                          |
| Crystal data                                              |                                        |                               |
| Space group                                               | $P2_12_12$                             | $P3_1$                        |
| Unit cell parameters, Å                                   | $a = 33.1$<br>$b = 90.8$<br>$c = 47.0$ | $a = b = 32.8$<br>$c = 107.4$ |
| Z*                                                        | 1                                      | 1                             |
| Data collection                                           |                                        |                               |
| Beamline                                                  | ID14-4 ESRF                            | ID14-4 ESRF                   |
| Wavelength, Å                                             | 0.9394                                 | 0.9394                        |
| Resolution, Å                                             | 23.5–2.65                              | 35.8–1.4                      |
| Observed reflections                                      | 18,136                                 | 67,545                        |
| Unique reflections                                        | 3,615                                  | 23,324                        |
| Completeness, %                                           | 80.9                                   | 94.5                          |
| in outer shell                                            | 84.5                                   | 98.0                          |
| $R_{\text{merge}}$ , % <sup>†</sup>                       | 4.8                                    | 4.8                           |
| in outer shell                                            | 30.8                                   | 13.7                          |
| Mean, (I)/sd(I)                                           | 25.1                                   | 14.1                          |
| in outer shell                                            | 5.2                                    | 5.7                           |
| Multiplicity, %                                           | 5                                      | 2.9                           |
| in outer shell                                            | 3.2                                    | 2.6                           |
| Structure Refinement                                      |                                        |                               |
| Resolution range, Å                                       | 23.5–2.65                              | 35.8–1.4                      |
| Used Reflections                                          | 3,614                                  | 23,280                        |
| R-factor <sup>‡</sup> /R <sub>free</sub> <sup>§</sup> , % | 21.4/24.7                              | 22.9/25.1                     |
| Number of RNfA atoms                                      | 900                                    | 940                           |
| Number of amnoglycosides                                  | 2                                      | 4                             |
| Number of ions                                            | —                                      | 1 K <sup>+</sup>              |
| Number of water molecules                                 | 11                                     | 250                           |
| rmsd                                                      |                                        |                               |
| Bond lengths, Å                                           | 0.006                                  | 0.007                         |
| Bond angles, °                                            | 0.9                                    | 0.9                           |

\*Number of RNA molecules in the asymmetric unit.

<sup>†</sup> $R_{\text{merge}} = 100 \times \sum_{hklj} |I_{hklj} - \langle I_{hklj} \rangle| / \sum_{hklj} \langle I_{hklj} \rangle$ .

<sup>‡</sup>R-factor =  $100 \times \sum (|F_o| - |F_c|) / \sum |F_o|$ , where  $|F_o|$  and  $|F_c|$  are the observed and calculated structure factor amplitudes, respectively.

<sup>§</sup>Calculated using a random set containing 10% of observations that were not included in refinement.
